# Supplementary material for: Textile dye degradation potential of plant laccase significantly enhances upon augmentation with redox mediators
Source: Royal Society of Chemistry journal article supplement (doi:10.1039/c5ra12454a), 2015-01-01
Supplement: c5ra12454a1.pdf [file c5ra12454a1.pdf]

**Table S1** Oxidation of phenolic and nonphenolic compounds in the presence of ABTS using purified laccase

| Substrates          | Structures                                                                          | $\lambda_{\max}$ (nm) | Specific activity* |
|---------------------|-------------------------------------------------------------------------------------|-----------------------|--------------------|
| Guaicol             | 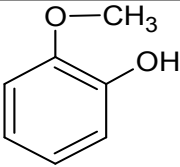   | 465                   | 10.25              |
| Pyrogallol          |    | 450                   | 2.50               |
| Veratryl alcohol    |    | 310                   | ND                 |
| Catechol            |  | 392                   | ND                 |
| Hydroquinone        |  | 248                   | ND                 |
| 2,6-dimethoxyphenol |  | 468                   | 22.5               |
| DAB                 |  | 420                   | ND                 |
| Caffeic acid        |  | 420                   | ND                 |

|                      |                                                                                     |     |       |
|----------------------|-------------------------------------------------------------------------------------|-----|-------|
| Syringic acid        | 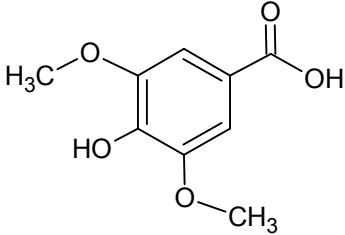   | 272 | ND    |
| <i>o</i> -tolidine   |    | 366 | 42.83 |
| <i>o</i> -danisidine |    | 460 | 15.16 |
| L-DOPA               |   | 470 | 3.30  |
| Syringaldazine       |  | 525 | 8.16  |

\*U mg<sup>-1</sup> of protein min<sup>-1</sup>

ND, Not Detected

**Table S2** Decolorization performance of purified laccase in presence of ABTS

| Name of the dye  | %<br>Decolorization | Time  | Spectra                                                                                                                                                                                                                                                                                                                                                                                                                                                                                  |
|------------------|---------------------|-------|------------------------------------------------------------------------------------------------------------------------------------------------------------------------------------------------------------------------------------------------------------------------------------------------------------------------------------------------------------------------------------------------------------------------------------------------------------------------------------------|
| Brilliant Blue R | 95.9                | 5 min | 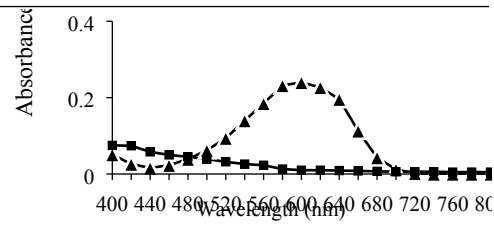 <p>The graph shows Absorbance on the y-axis (0 to 0.4) and Wavelength (nm) on the x-axis (400 to 800). Two curves are plotted: one with triangles and one with squares. The triangle curve shows a broad peak centered around 600 nm with a maximum absorbance of approximately 0.25. The square curve remains relatively flat and low, near zero, across the entire wavelength range.</p>            |
| Reactive Red 2   | 94.2                | 0.5 h |  <p>The graph shows Absorbance on the y-axis (0 to 0.2) and Wavelength (nm) on the x-axis (400 to 800). Two curves are plotted: one with triangles and one with squares. The triangle curve shows a sharp peak at approximately 520 nm with a maximum absorbance of about 0.18. The square curve is very low, near zero, across the entire wavelength range.</p>                                       |
| Direct Red 5B    | 76.5                | 0.5 h |  <p>The graph shows Absorbance on the y-axis (0 to 0.3) and Wavelength (nm) on the x-axis (400 to 800). Two curves are plotted: one with triangles and one with squares. The triangle curve shows a peak at approximately 520 nm with a maximum absorbance of about 0.22. The square curve shows a broad, low absorbance across the range, peaking slightly around 500 nm at approximately 0.05.</p> |
| Malachite Green  | 80.1                | 2 h   |  <p>The graph shows Absorbance on the y-axis (0 to 1) and Wavelength (nm) on the x-axis (400 to 800). Two curves are plotted: one with triangles and one with squares. The triangle curve shows a sharp peak at approximately 620 nm with a maximum absorbance of about 0.9. The square curve shows a broad peak around 550 nm with a maximum absorbance of about 0.2.</p>                           |
| Methyl Orange    | 49.2                | 2 h   |  <p>The graph shows Absorbance on the y-axis (0 to 0.8) and Wavelength (nm) on the x-axis (400 to 800). Two curves are plotted: one with triangles and one with squares. The triangle curve shows a peak at approximately 460 nm with a maximum absorbance of about 0.75. The square curve shows a broad peak around 440 nm with a maximum absorbance of about 0.4.</p>                              |
